# Supplementary material for: Cationic modified nucleic acids for use in DNA hairpins and parallel triplexes
Source: Royal Society of Chemistry journal article supplement (doi:10.1039/c1ob05085k), 2011-01-01

## Cationic Modified Nucleic Acids for use in DNA Hairpins and Parallel Triplexes

Niels Bomholt,<sup>\*1</sup> Vyacheslav V. Filichev,<sup>2</sup> and Erik B. Pedersen<sup>1</sup>

<sup>1</sup>Nucleic Acid Center, Department of Physics and Chemistry, University of Southern Denmark, Odense, Denmark

<sup>2</sup>College of Sciences, Institute of Fundamental Sciences, Massey University, Palmerston North, New Zealand

### Electronic Supplementary Information

|                                                                                                                                             |    |
|---------------------------------------------------------------------------------------------------------------------------------------------|----|
| pK <sub>a</sub> -values of related tertiary amines in H <sub>2</sub> O .....                                                                | 1  |
| Gel electrophoresis study with ON2 and increasing concentration of NaCl .....                                                               | 2  |
| Gel electrophoresis study with ON1 and Mg <sup>2+</sup> , Mn <sup>2+</sup> , Ni <sup>2+</sup> , Cu <sup>2+</sup> and Zn <sup>2+</sup> ..... | 2  |
| Gel electrophoresis study with ON2 and Mg <sup>2+</sup> , Mn <sup>2+</sup> , Ni <sup>2+</sup> , Cu <sup>2+</sup> and Zn <sup>2+</sup> ..... | 2  |
| Gel electrophoresis study with ON3 and Mg <sup>2+</sup> , Mn <sup>2+</sup> , Ni <sup>2+</sup> , Cu <sup>2+</sup> and Zn <sup>2+</sup> ..... | 3  |
| Thermal denaturation study with Cu <sup>2+</sup> at pH 5.0 and pH 8.0 .....                                                                 | 4  |
| Thermal denaturation study with increasing ON-concentration .....                                                                           | 5  |
| Thermal denaturation study with X and Y as bulge insertion in parallel triplex .....                                                        | 6  |
| Thermal denaturation study with X and Y as replacement of thymine in parallel triplex .....                                                 | 6  |
| NMR spectra of compound 1-6.....                                                                                                            | 7  |
| IR spectra of compound 1-6.....                                                                                                             | 21 |

### pK<sub>a</sub>-values of related tertiary amines in H<sub>2</sub>O

| Amine(s)                                       | Temperature | pK <sub>a</sub> <sup>1</sup> | pK <sub>a</sub> <sup>2</sup> |
|------------------------------------------------|-------------|------------------------------|------------------------------|
| Benzyl dimethylamine                           | 25 °C       | 8.79 <sup>a</sup>            | -                            |
| 1,2-Bis(dimethylaminomethyl)benzene            | 35 °C       | 10.58 <sup>b</sup>           | 4.97 <sup>b</sup>            |
| 1,4-Bis(dimethylaminomethyl)benzene            | 25 °C       | 9.65 <sup>c</sup>            | -                            |
| <i>N</i> -Benzyl- <i>N</i> -methylethanolamine | 25 °C       | 8.41 <sup>d</sup>            | -                            |
| 1,4-Dimethylpiperazine                         | 25 °C       | 7.84 <sup>e</sup>            | 3.45 <sup>e</sup>            |
| 1-(2-Hydroxyethyl)piperazine                   | 25 °C       | 8.63 <sup>e</sup>            | 3.60 <sup>e</sup>            |

<sup>a</sup> J. Armstrong and R. B. Barlow, *Br. J. Pharmacol.*, 1976, **57**, 501-516.

<sup>b</sup> J. Hine and W. S. Li, *J. Org. Chem.*, 1975, **40**, 1795-1800.

<sup>c</sup> A. De Roocker and P. De Radtitzky, *Bull. Soc. Chim. Belg.*, 1964, **73**, 181-&.

<sup>d</sup> W. R. Morgan and D. E. Leyden, *J. Am. Chem. Soc.*, 1970, **92**, 4527-4531.

<sup>e</sup> F. Khalili, A. Henni and A. L. L. East, *J. Chem. Eng. Data*, 2009, **54**, 2914-2917.

## Gel electrophoresis study with ON2 and increasing concentration of NaCl

|               |                                          |             | Lane     | A | B | C | D | E | F |
|---------------|------------------------------------------|-------------|----------|---|---|---|---|---|---|
| <b>ON-ref</b> | 3'-TGT CAG ACC GGC                       | 100mM NaCl  | <b>A</b> |   |   |   |   |   |   |
| <b>D1</b>     | 3'-TGT CAG ACC GGC<br>5'-ACA GTC TGG CCG | 100mM NaCl  | <b>B</b> |   |   |   |   |   |   |
| <b>ON2</b>    | 3'-GCA CGT- <b>xx</b> -ACG TGC           | 10mM NaCl   | <b>C</b> |   |   |   |   |   |   |
| <b>ON2</b>    | 3'-GCA CGT- <b>xx</b> -ACG TGC           | 100mM NaCl  | <b>D</b> |   |   |   |   |   |   |
| <b>ON2</b>    | 3'-GCA CGT- <b>xx</b> -ACG TGC           | 1000mM NaCl | <b>E</b> |   |   |   |   |   |   |
| <b>D1</b>     | 3'-TGT CAG ACC GGC<br>5'-ACA GTC TGG CCG | 100mM NaCl  | <b>H</b> |   |   |   |   |   |   |

Fig. 1. Nondenaturing 20 % PAGE; 25  $\mu$ M of ON-ref, D1 and ON2 in TB-buffer, pH 8.0, 4  $^{\circ}$ C.

## Gel electrophoresis study with ON1 and Mg<sup>2+</sup>, Mn<sup>2+</sup>, Ni<sup>2+</sup>, Cu<sup>2+</sup> and Zn<sup>2+</sup>

|               |                                          |                         | Lane     | A | B | C | D | E | F | G | H | I |
|---------------|------------------------------------------|-------------------------|----------|---|---|---|---|---|---|---|---|---|
| <b>ON-ref</b> | 3'-TGT CAG ACC GGC                       | 10mM MgCl <sub>2</sub>  | <b>A</b> |   |   |   |   |   |   |   |   |   |
| <b>D1</b>     | 3'-TGT CAG ACC GGC<br>5'-ACA GTC TGG CCG | 10mM MgCl <sub>2</sub>  | <b>B</b> |   |   |   |   |   |   |   |   |   |
| <b>ON1</b>    | 3'-GCA CGT- <b>x</b> -ACG TGC            | 10mM MgCl <sub>2</sub>  | <b>C</b> |   |   |   |   |   |   |   |   |   |
| <b>ON1</b>    | 3'-GCA CGT- <b>x</b> -ACG TGC            | 10mM MgCl <sub>2</sub>  | <b>D</b> |   |   |   |   |   |   |   |   |   |
| <b>ON1</b>    | 3'-GCA CGT- <b>x</b> -ACG TGC            | 250nM ZnCl <sub>2</sub> | <b>E</b> |   |   |   |   |   |   |   |   |   |
| <b>ON1</b>    | 3'-GCA CGT- <b>x</b> -ACG TGC            | 250nM NiCl <sub>2</sub> | <b>F</b> |   |   |   |   |   |   |   |   |   |
| <b>ON1</b>    | 3'-GCA CGT- <b>x</b> -ACG TGC            | 250nM CuSO <sub>4</sub> | <b>G</b> |   |   |   |   |   |   |   |   |   |
| <b>ON1</b>    | 3'-GCA CGT- <b>x</b> -ACG TGC            | 250nM MnSO <sub>4</sub> | <b>H</b> |   |   |   |   |   |   |   |   |   |
| <b>D1</b>     | 3'-TGT CAG ACC GGC<br>5'-ACA GTC TGG CCG | 10mM MgCl <sub>2</sub>  | <b>I</b> |   |   |   |   |   |   |   |   |   |

Fig. 2. Nondenaturing 20 % PAGE; 25  $\mu$ M of ON-ref, D1 and ON1 in TB-buffer, 100 mM NaCl, pH 8.0, 4  $^{\circ}$ C.

## Gel electrophoresis study with ON2 and Mg<sup>2+</sup>, Mn<sup>2+</sup>, Ni<sup>2+</sup>, Cu<sup>2+</sup> and Zn<sup>2+</sup>

|               |                                          |                         | Lane     | A | B | C | D | E | F | G | H | I |
|---------------|------------------------------------------|-------------------------|----------|---|---|---|---|---|---|---|---|---|
| <b>ON-ref</b> | 3'-TGT CAG ACC GGC                       | 10mM MgCl <sub>2</sub>  | <b>A</b> |   |   |   |   |   |   |   |   |   |
| <b>D1</b>     | 3'-TGT CAG ACC GGC<br>5'-ACA GTC TGG CCG | 10mM MgCl <sub>2</sub>  | <b>B</b> |   |   |   |   |   |   |   |   |   |
| <b>ON2</b>    | 3'-GCA CGT- <b>xx</b> -ACG TGC           | 10mM MgCl <sub>2</sub>  | <b>C</b> |   |   |   |   |   |   |   |   |   |
| <b>ON2</b>    | 3'-GCA CGT- <b>xx</b> -ACG TGC           | 10mM MgCl <sub>2</sub>  | <b>D</b> |   |   |   |   |   |   |   |   |   |
| <b>ON2</b>    | 3'-GCA CGT- <b>xx</b> -ACG TGC           | 250nM ZnCl <sub>2</sub> | <b>E</b> |   |   |   |   |   |   |   |   |   |
| <b>ON2</b>    | 3'-GCA CGT- <b>xx</b> -ACG TGC           | 250nM NiCl <sub>2</sub> | <b>F</b> |   |   |   |   |   |   |   |   |   |
| <b>ON2</b>    | 3'-GCA CGT- <b>xx</b> -ACG TGC           | 250nM CuSO <sub>4</sub> | <b>G</b> |   |   |   |   |   |   |   |   |   |
| <b>ON2</b>    | 3'-GCA CGT- <b>xx</b> -ACG TGC           | 250nM MnSO <sub>4</sub> | <b>H</b> |   |   |   |   |   |   |   |   |   |
| <b>D1</b>     | 3'-TGT CAG ACC GGC<br>5'-ACA GTC TGG CCG | 10mM MgCl <sub>2</sub>  | <b>I</b> |   |   |   |   |   |   |   |   |   |

Fig. 3. Nondenaturing 20 % PAGE; 25  $\mu$ M of ON-ref, D1 and ON2 in TB-buffer, 100 mM NaCl, pH 8.0, 4  $^{\circ}$ C.

### Gel electrophoresis study with ON3 and Mg<sup>2+</sup>, Mn<sup>2+</sup>, Ni<sup>2+</sup>, Cu<sup>2+</sup> and Zn<sup>2+</sup>

|               |                                |                         |  |  | Lane     | A | B | C | D | E | F | G | H | I |
|---------------|--------------------------------|-------------------------|--|--|----------|---|---|---|---|---|---|---|---|---|
| <b>ON-ref</b> | 3' -TGT CAG ACC GGC            | 10mM MgCl <sub>2</sub>  |  |  | <b>A</b> |   |   |   |   |   |   |   |   |   |
| <b>D1</b>     | 3' -TGT CAG ACC GGC            | 10mM MgCl <sub>2</sub>  |  |  | <b>B</b> |   |   |   |   |   |   |   |   |   |
|               | 5' -ACA GTC TGG CCG            |                         |  |  |          |   |   |   |   |   |   |   |   |   |
| <b>ON3</b>    | 3' -GCA CGT- <b>Y</b> -ACG TGC | 10mM MgCl <sub>2</sub>  |  |  | <b>C</b> |   |   |   |   |   |   |   |   |   |
| <b>ON3</b>    | 3' -GCA CGT- <b>Y</b> -ACG TGC | 10mM MgCl <sub>2</sub>  |  |  | <b>D</b> |   |   |   |   |   |   |   |   |   |
| <b>ON3</b>    | 3' -GCA CGT- <b>Y</b> -ACG TGC | 250nM ZnCl <sub>2</sub> |  |  | <b>E</b> |   |   |   |   |   |   |   |   |   |
| <b>ON3</b>    | 3' -GCA CGT- <b>Y</b> -ACG TGC | 250nM NiCl <sub>2</sub> |  |  | <b>F</b> |   |   |   |   |   |   |   |   |   |
| <b>ON3</b>    | 3' -GCA CGT- <b>Y</b> -ACG TGC | 250nM CuSO <sub>4</sub> |  |  | <b>G</b> |   |   |   |   |   |   |   |   |   |
| <b>ON3</b>    | 3' -GCA CGT- <b>Y</b> -ACG TGC | 250nM MnSO <sub>4</sub> |  |  | <b>H</b> |   |   |   |   |   |   |   |   |   |
| <b>D1</b>     | 3' -TGT CAG ACC GGC            | 10mM MgCl <sub>2</sub>  |  |  | <b>I</b> |   |   |   |   |   |   |   |   |   |
|               | 5' -ACA GTC TGG CCG            |                         |  |  |          |   |   |   |   |   |   |   |   |   |

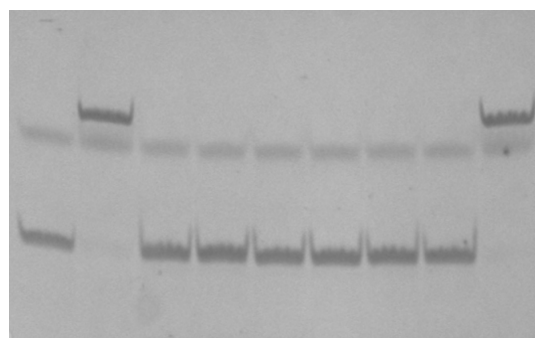

**Fig. 4.** Nondenaturing 20 % PAGE; 25  $\mu$ M of **ON-ref**, **D1** and **ON3** in TB-buffer, 100 mM NaCl, pH 8.0, 4 °C.

## Thermal denaturation study with Cu<sup>2+</sup> at pH 5.0 and pH 8.0

### Melting curves pH 5.0

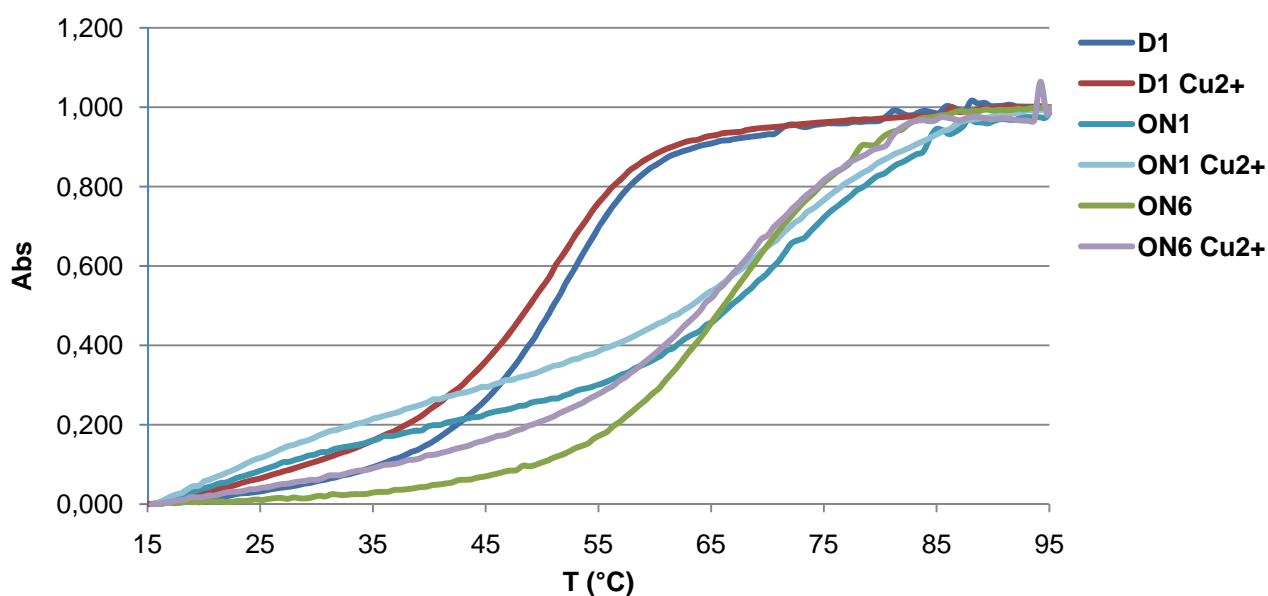

**Fig. 5.** Melting curves of thermal denaturation experiments of duplex **D1** and hairpin **ON1** and **ON6** recorded with 5  $\mu$ M of each ON in 10mM Na<sub>2</sub>HPO<sub>4</sub>/NaH<sub>2</sub>PO<sub>4</sub> at pH5.0 and 100mM NaCl and with and without 5  $\mu$ M CuSO<sub>4</sub> at 260nm versus temperature, with a heating of 1.0 °C/min.

### Melting curves pH 8.0

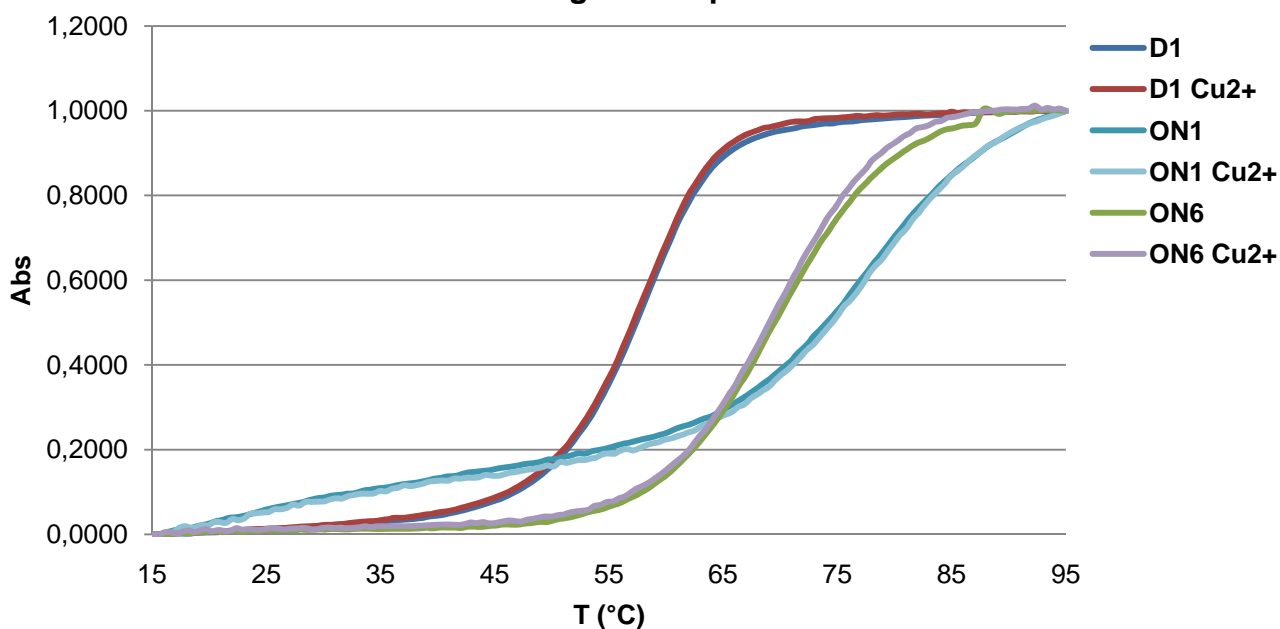

**Fig. 6.** Melting curves of thermal denaturation experiments of duplex **D1** and hairpin **ON1** and **ON6** recorded with 5  $\mu$ M of each ON in 10mM Na<sub>2</sub>HPO<sub>4</sub>/NaH<sub>2</sub>PO<sub>4</sub> at pH8.0 and 100mM NaCl and with and without 5  $\mu$ M CuSO<sub>4</sub> at 260nm versus temperature, with a heating of 1.0 °C/min.

## Thermal denaturation study with increasing ON-concentration Concentration Dependence pH8.0

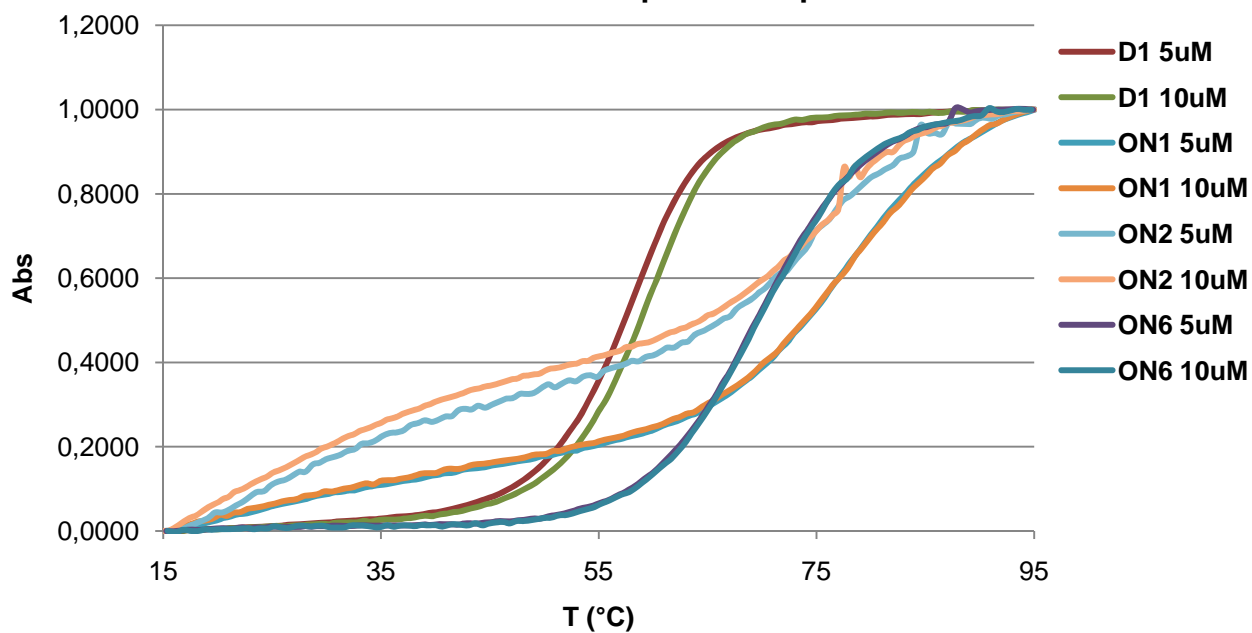

**Fig. 7.** Melting curves of thermal denaturation experiments of duplex **D1** and hairpin **ON1-2** and **ON6** recorded with 5  $\mu$ M and 10  $\mu$ M of each ON in 10mM  $\text{Na}_2\text{HPO}_4/\text{NaH}_2\text{PO}_4$  at pH8.0 and 100mM NaCl at 260nm versus temperature, with a heating of 1.0  $^\circ\text{C}/\text{min}$ .

## Thermal denaturation study with X and Y as bulge insertion in parallel triplex

| Entry       | Sequence                               | 5' -GAAGCTCTTTTCTCTTTT<br>3' -CTTCGAGAAAAGAGAAAA |              |
|-------------|----------------------------------------|--------------------------------------------------|--------------|
|             |                                        | pH 5.0 <sup>a</sup>                              | $\Delta T_m$ |
| <b>ONS1</b> | 3' -TCTTTT-CTCTTTT                     | 56.0*                                            | <i>ref.</i>  |
| <b>ONS2</b> | 3' -TCTTTT CTCTTTT<br>L <sub>X</sub> J | 36.5                                             | -19.5        |
| <b>ONS3</b> | 3' -TCTTTT CTCTTTT<br>L <sub>Y</sub> J | 27.0                                             | -29.0        |
| <b>ONS4</b> | 3' -TCTTTT CTCTTTT<br>L <sub>C</sub> J | 43.0                                             | -13.0        |

**Table 1.** a)  $C = 1.5 \mu\text{M}$  of **ONS1-4** and  $1.0 \mu\text{M}$  of each strand of dsDNA in 20 mM sodium cacodylate, 100 mM NaCl, 10 mM MgCl<sub>2</sub>, pH 5.0; duplex  $T_m = 54.5^\circ\text{C}$ ; Target regions are underlined for TFO hybridization. \*Triplex-duplex melting overlap.

## Thermal denaturation study with X and Y as replacement of thymine in parallel triplex

| Entry       | Sequence               | 5' -GAAGCTCTTTTGCTCTTTT<br>3' -CTTCGAGAAAACGAGAAAA |              |                     |              |
|-------------|------------------------|----------------------------------------------------|--------------|---------------------|--------------|
|             |                        | pH 5.0 <sup>a</sup>                                | $\Delta T_m$ | pH 6.0 <sup>a</sup> | $\Delta T_m$ |
| <b>ONS1</b> | 3' -TCT TTT TCT CTT TT | 35.5                                               | <i>ref.</i>  | 20.5                | <i>ref.</i>  |
| <b>ONS2</b> | 3' -TCT TTT XCT CTT TT | 31.5                                               | -4.0         | 15.5                | -5.0         |
| <b>ONS3</b> | 3' -TCT TTT YCT CTT TT | 24.5                                               | -11.0        | 9.0                 | -11.5        |

**Table 2.** a)  $C = 1.5 \mu\text{M}$  of **ONS1-3** and  $1.0 \mu\text{M}$  of each strand of dsDNA in 20 mM sodium cacodylate, 100 mM NaCl, 10 mM MgCl<sub>2</sub>, pH 5.0 and 6.0; duplex  $T_m = 60.0^\circ\text{C}$  (pH 5.0),  $61.0^\circ\text{C}$  (pH 6.0); target regions are underlined for TFO hybridization.

## NMR spectra of compound 1-6

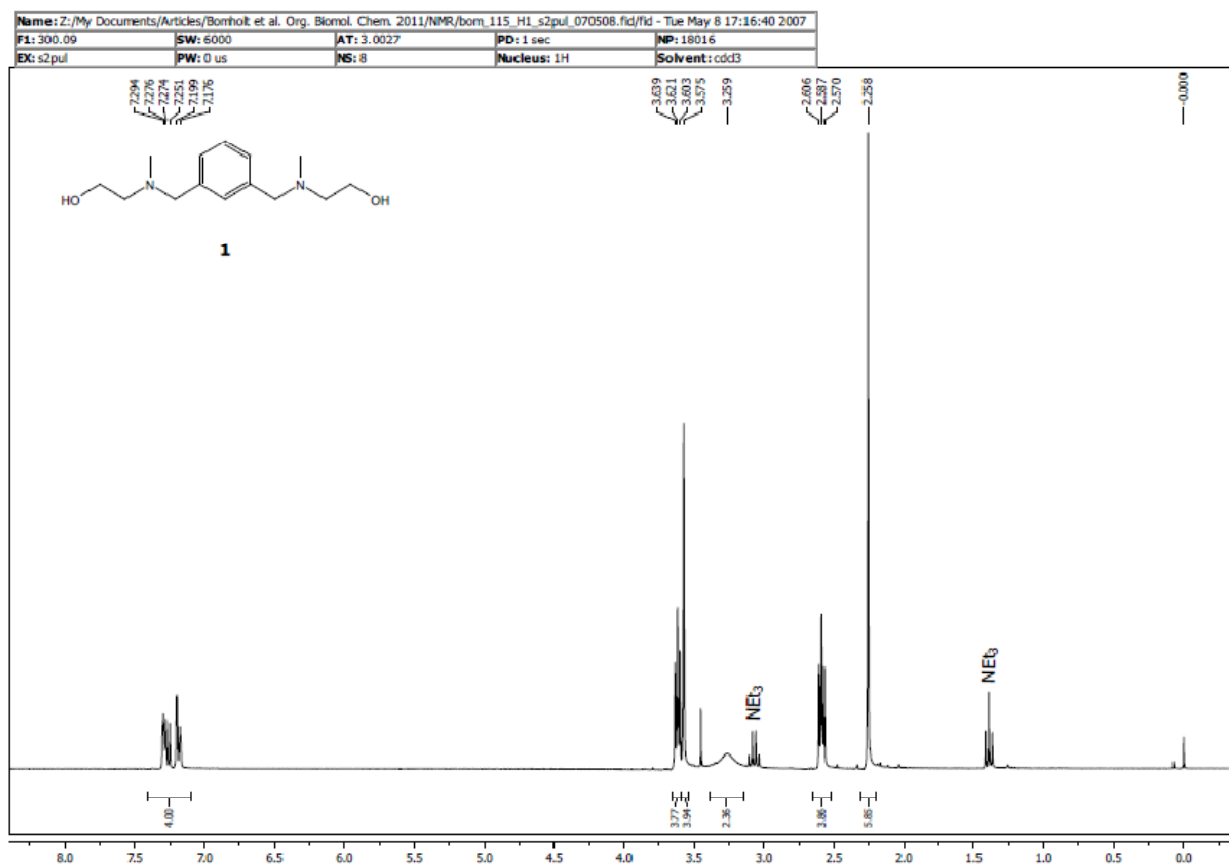

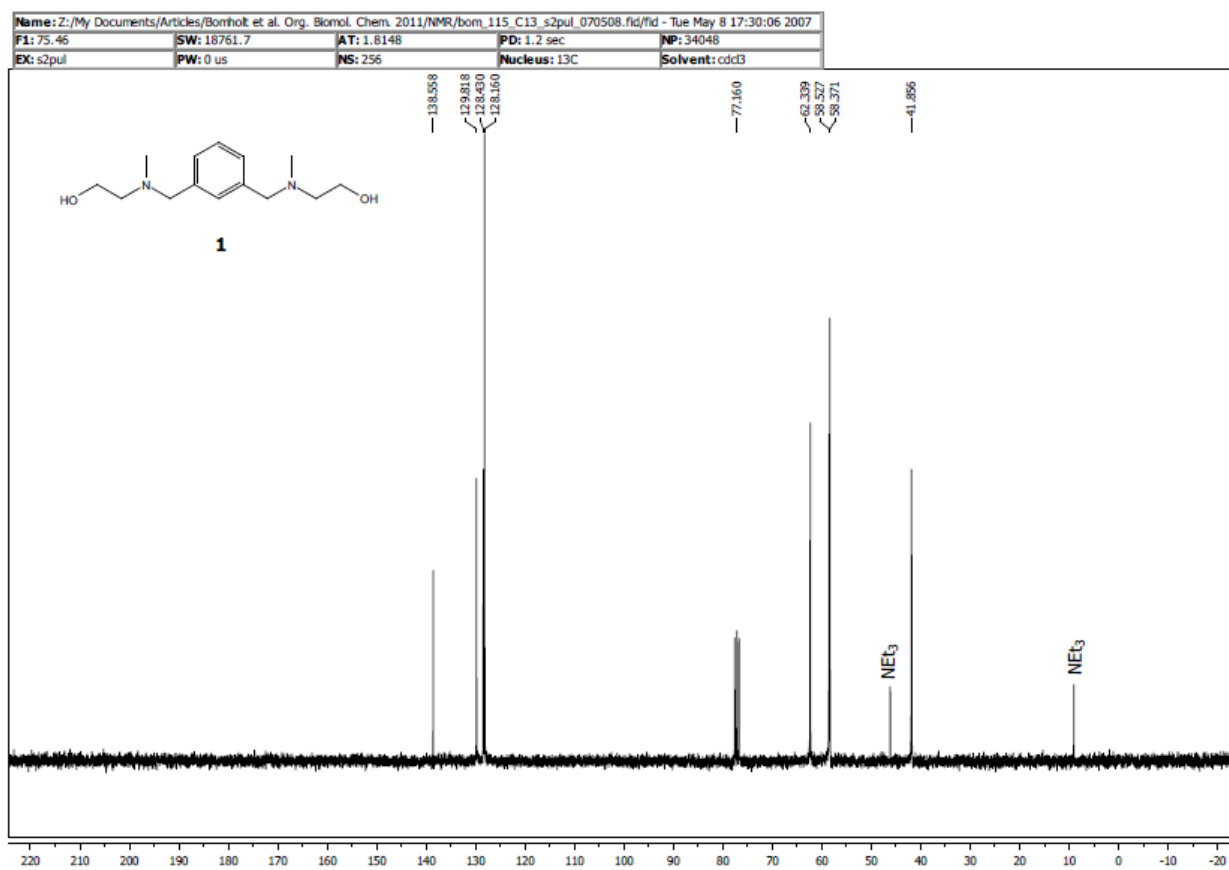



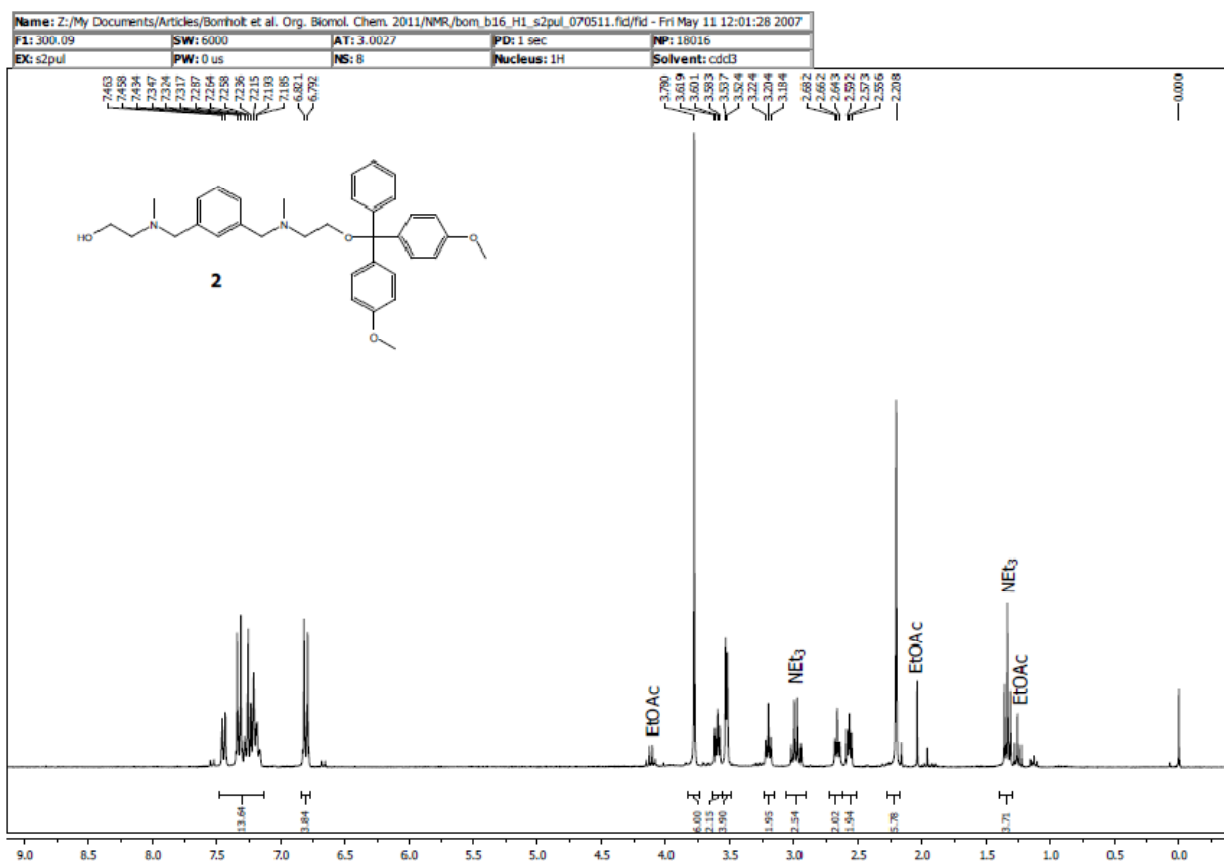

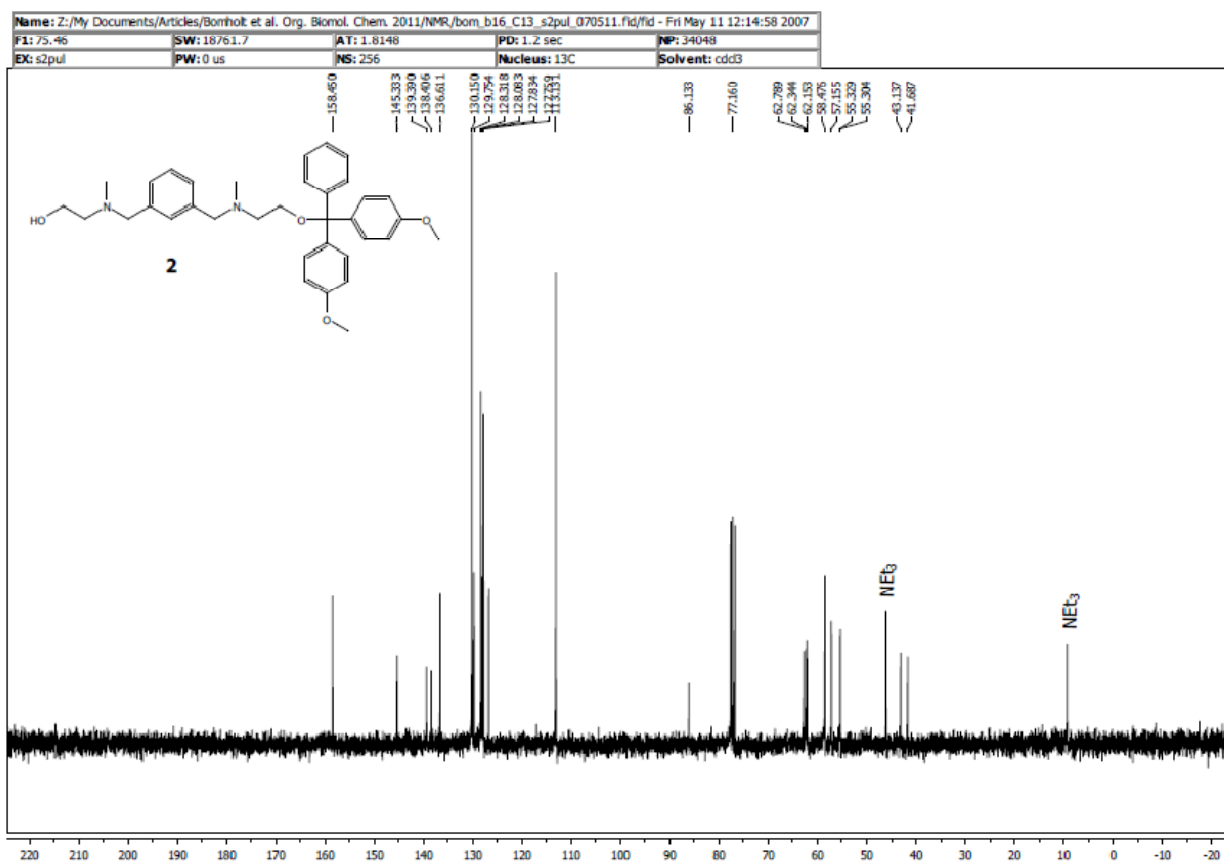

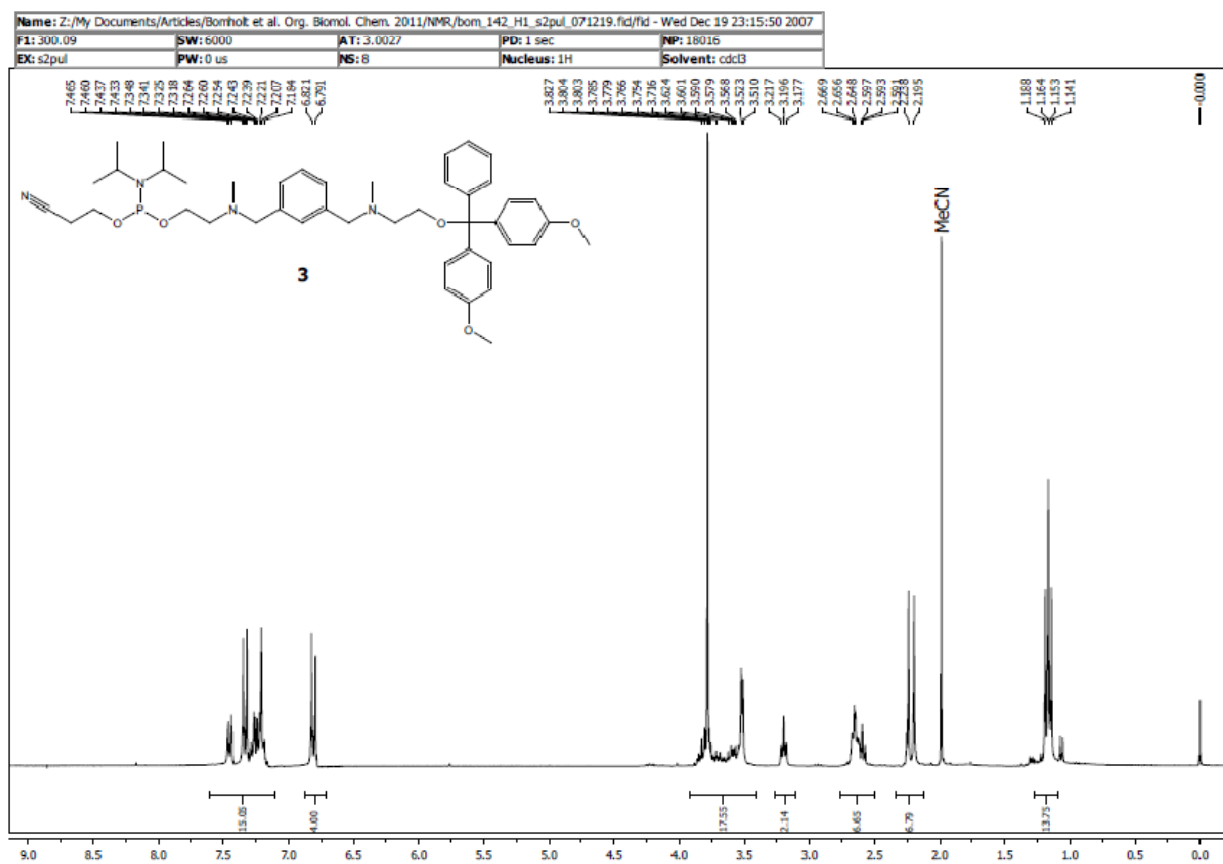

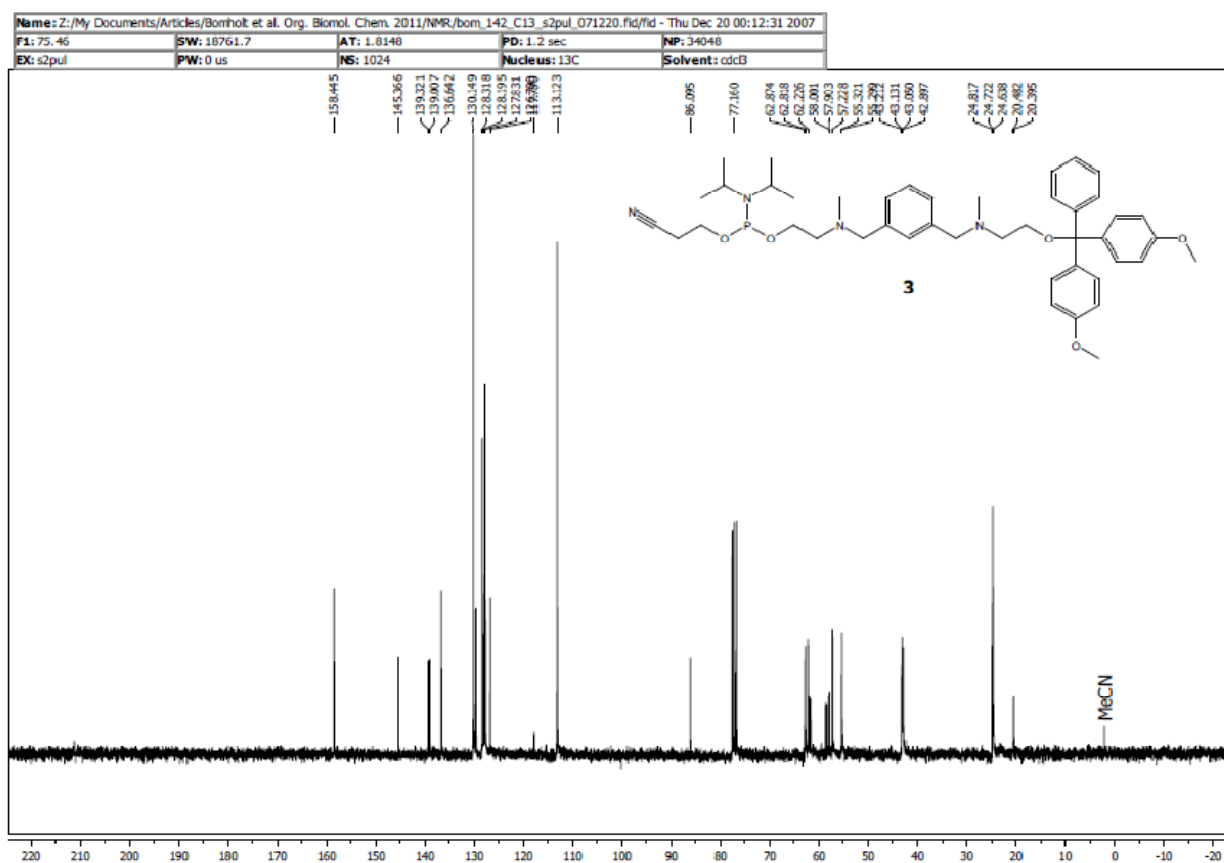

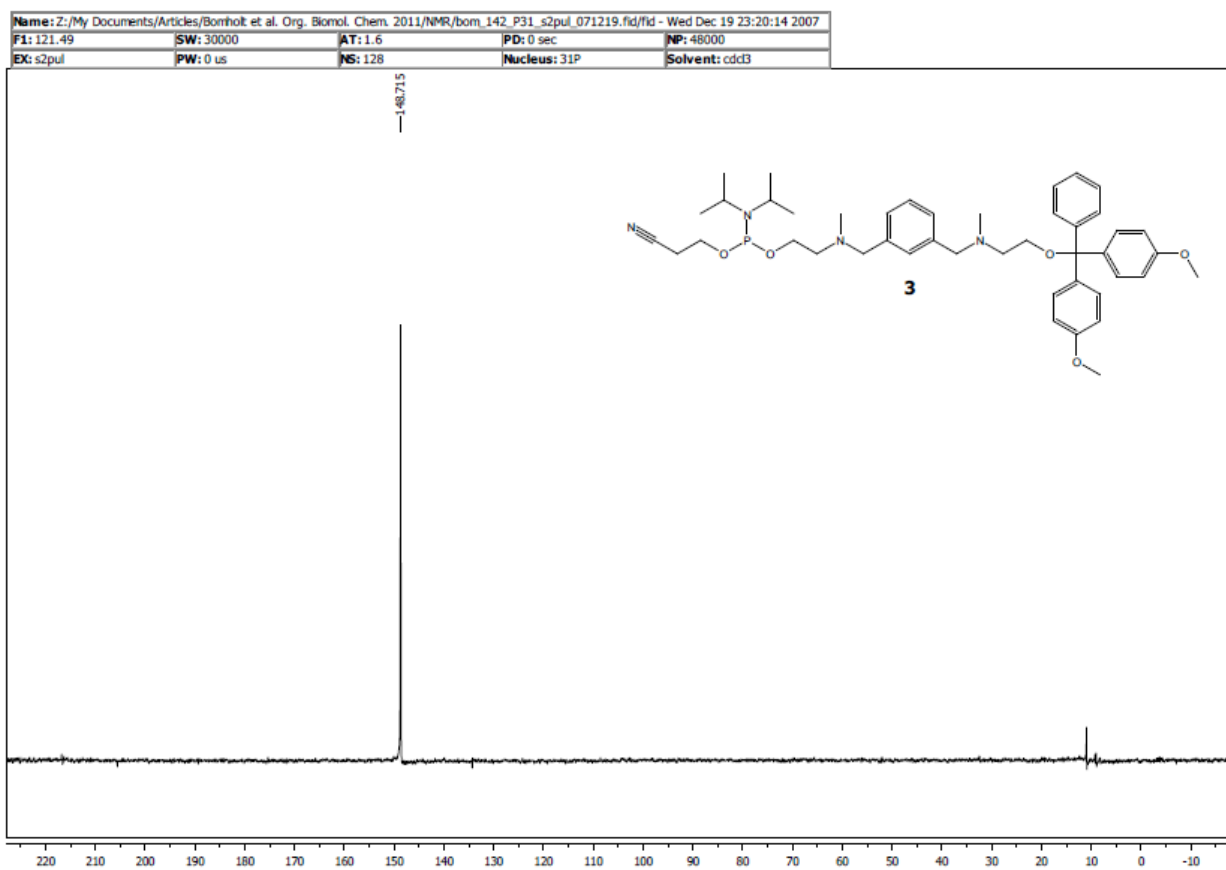

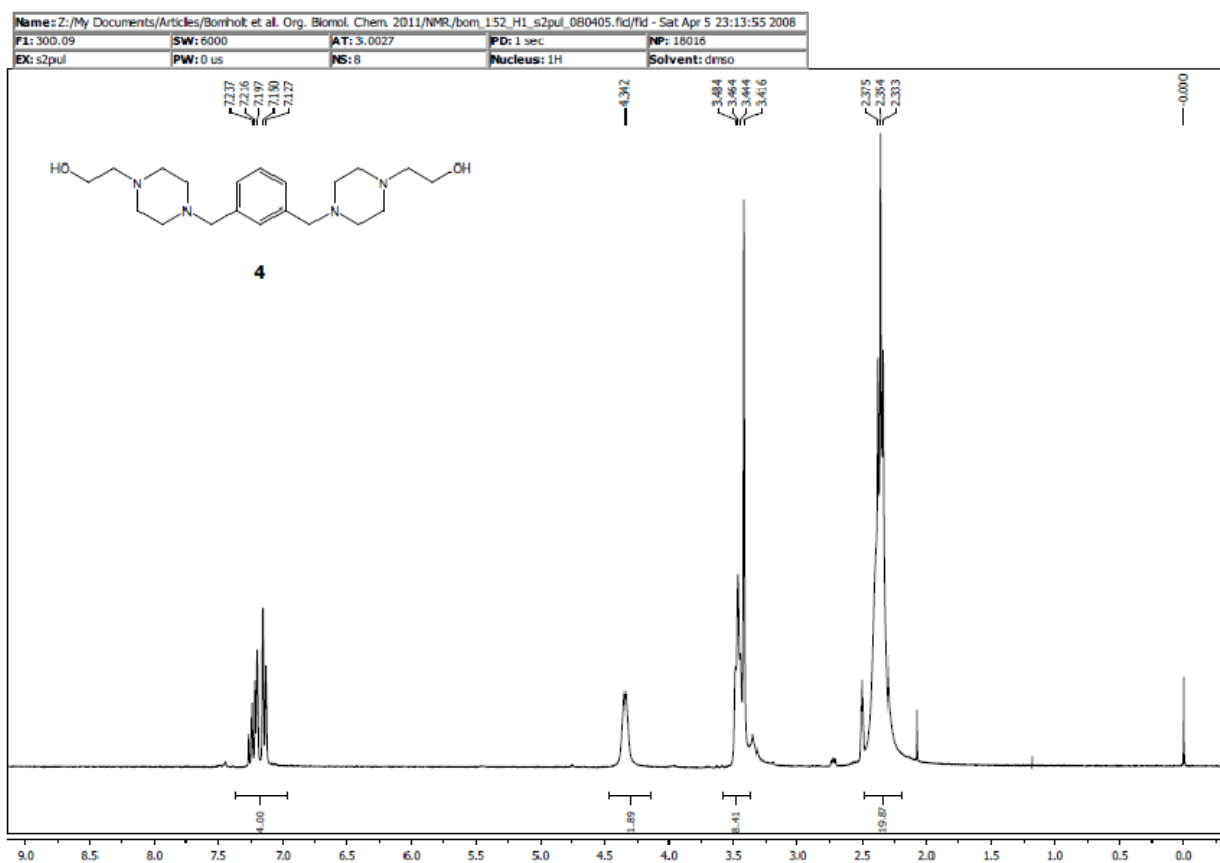

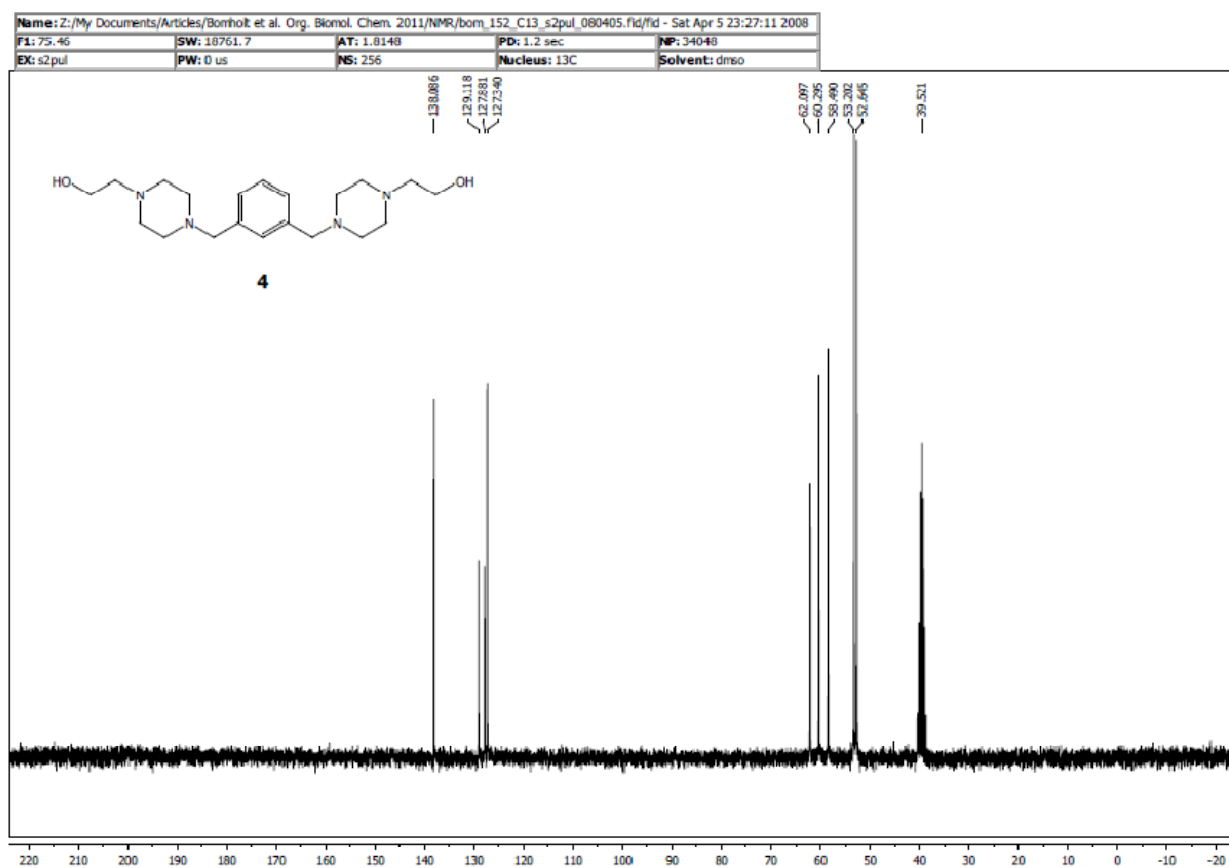

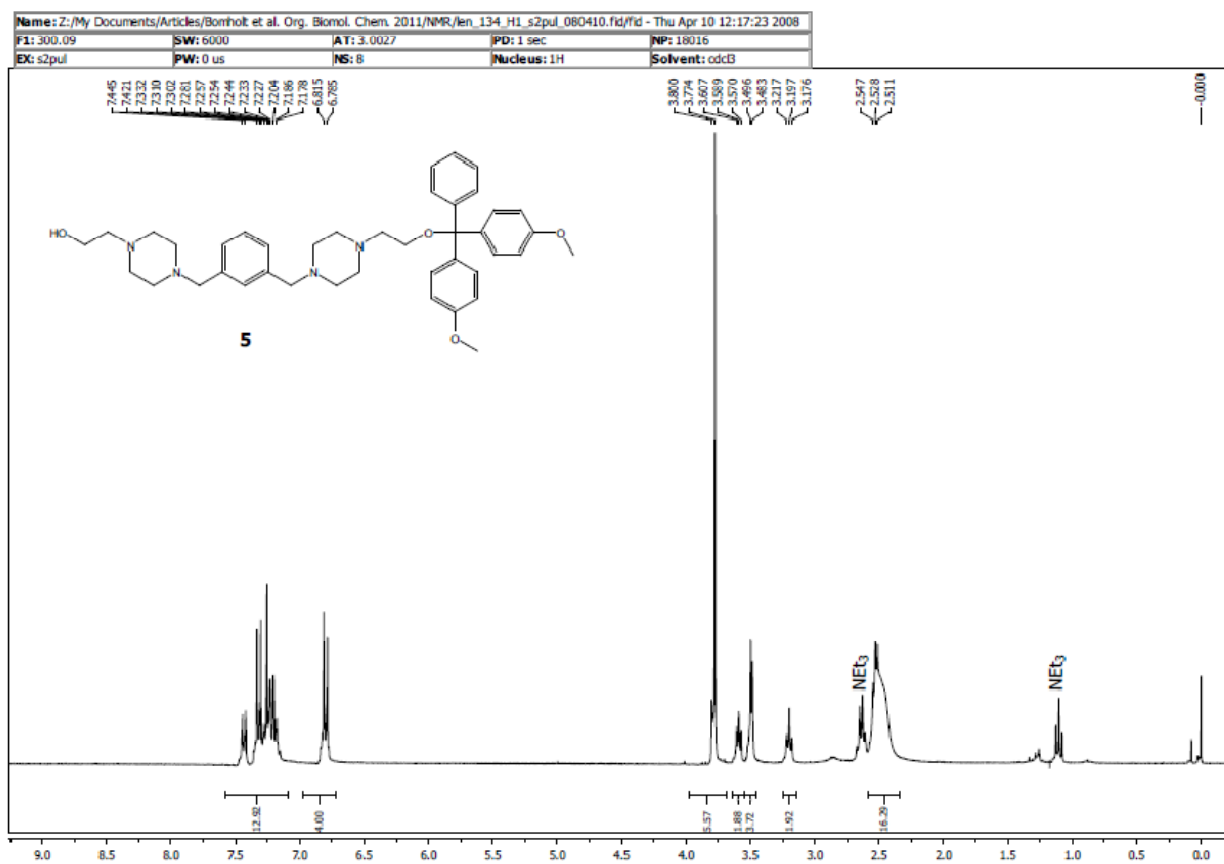



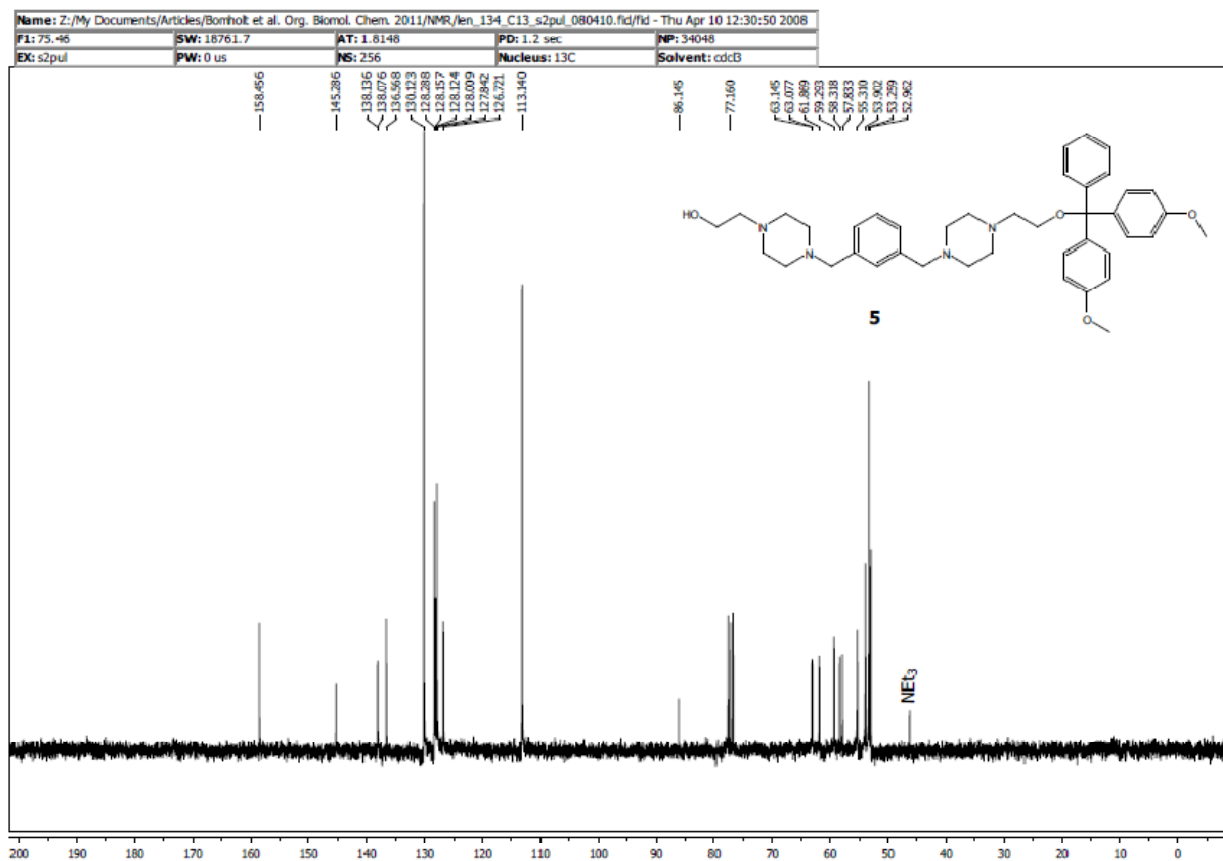

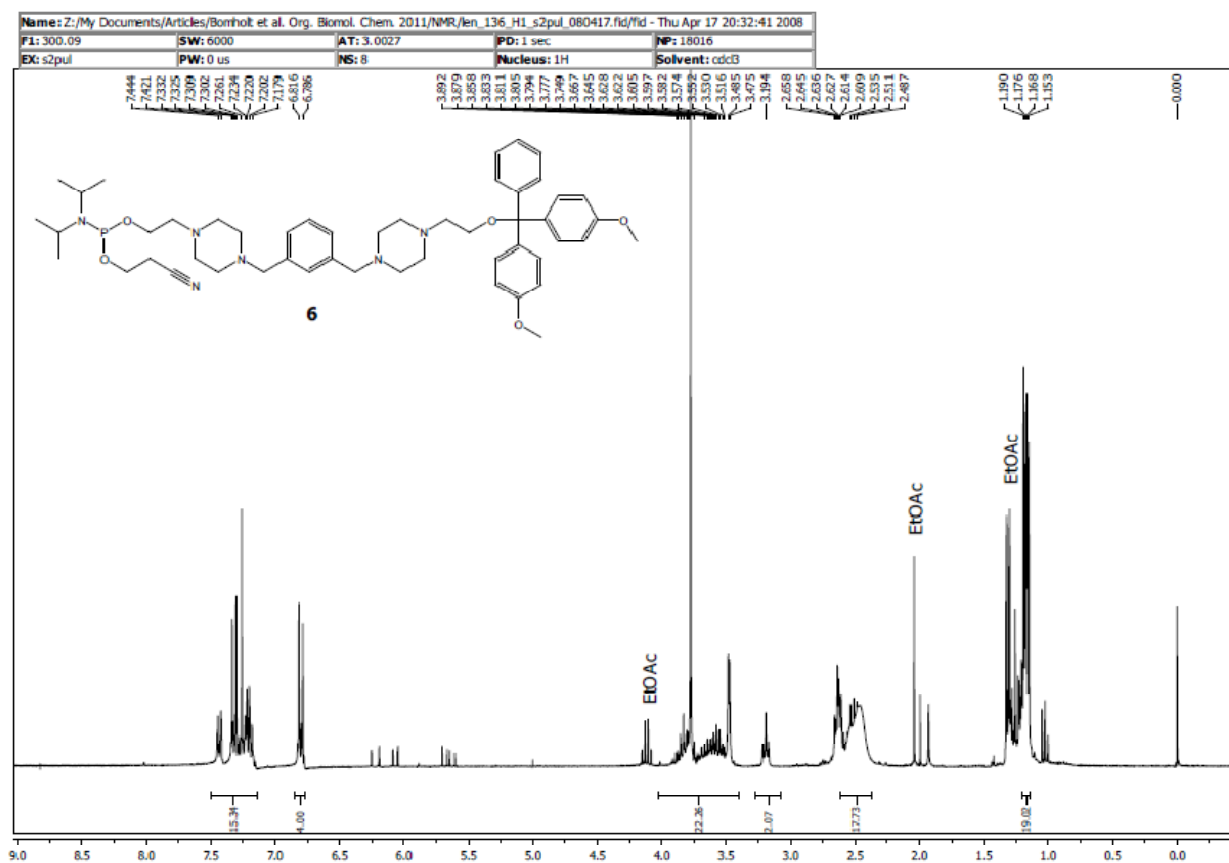

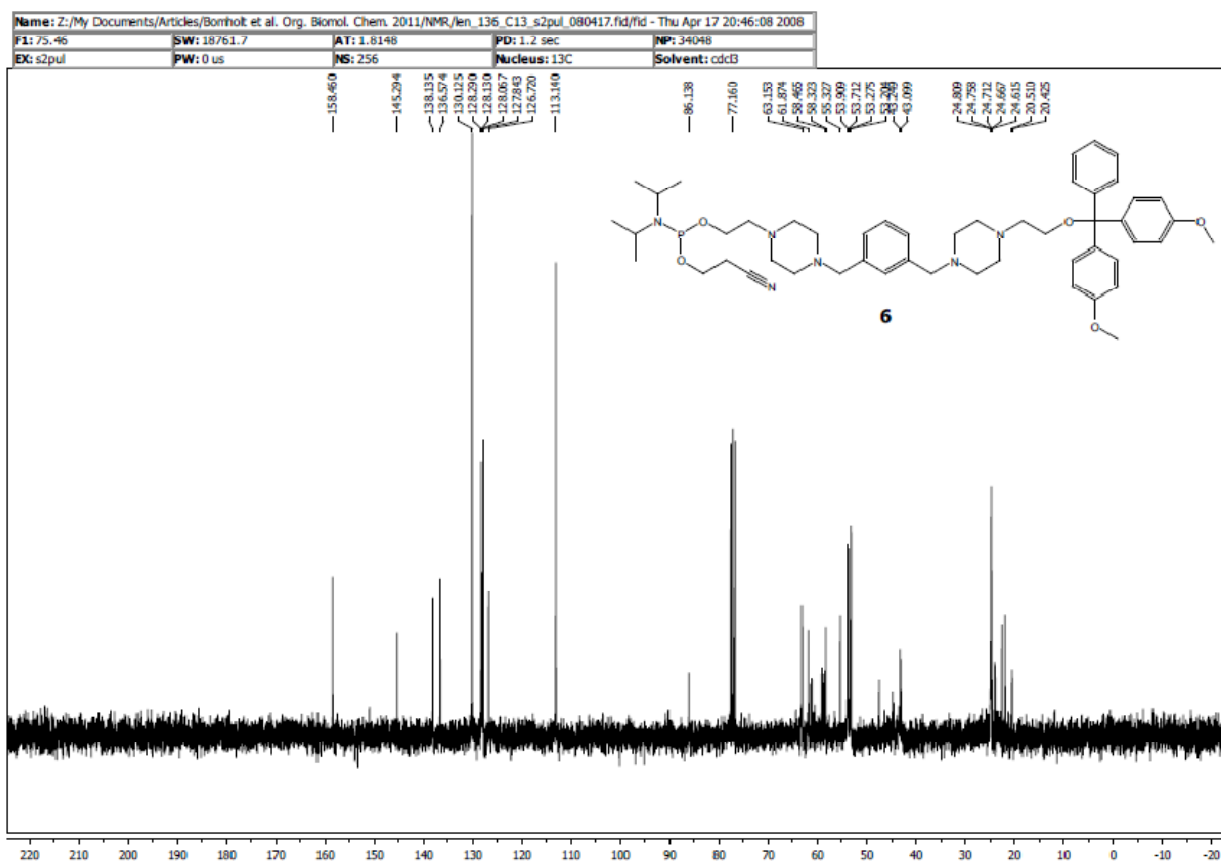

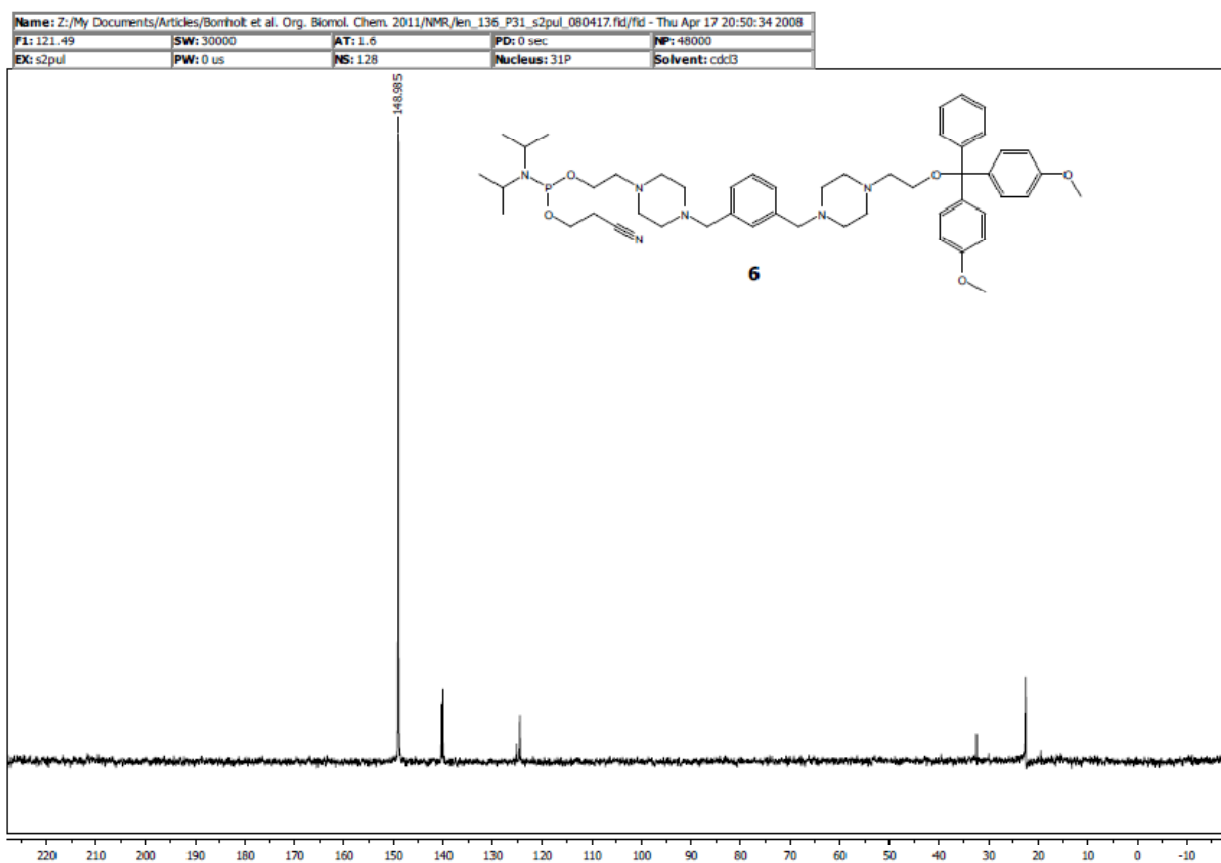

## IR spectra of compound 1-6

### *Compound 1*

---

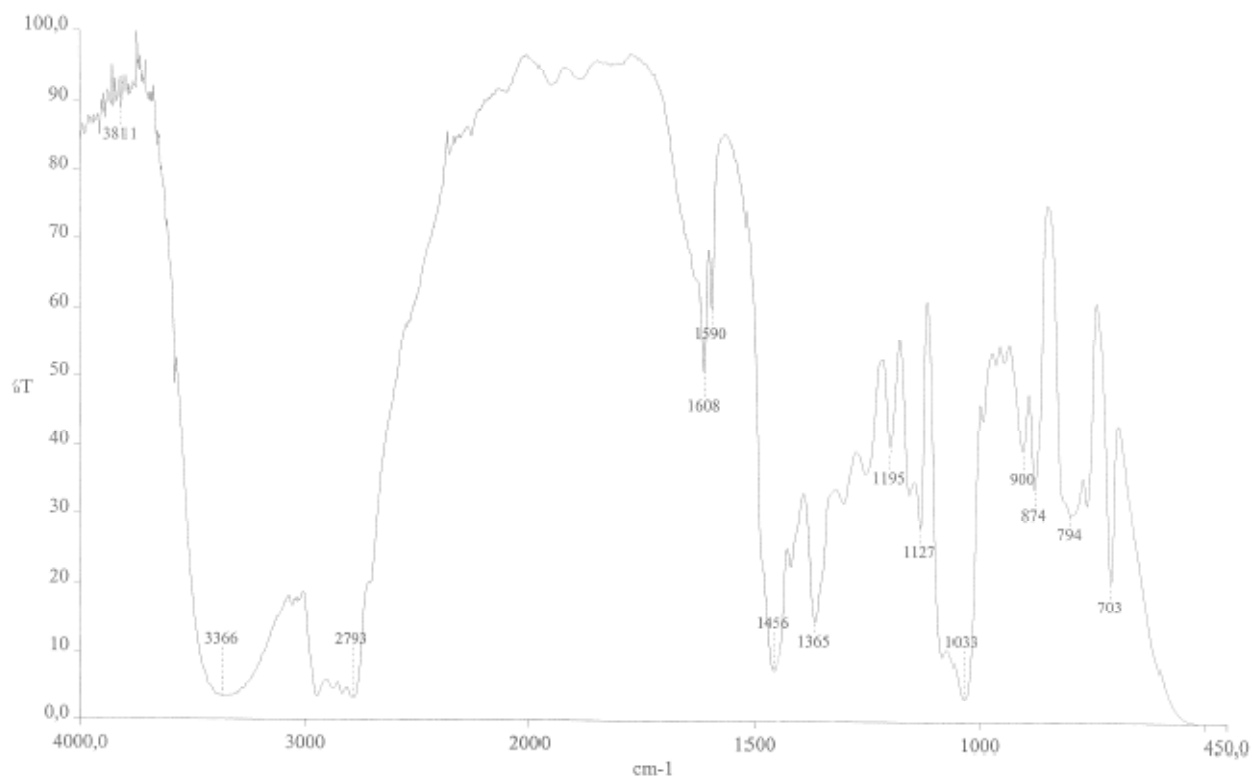

*Compound 2*

---

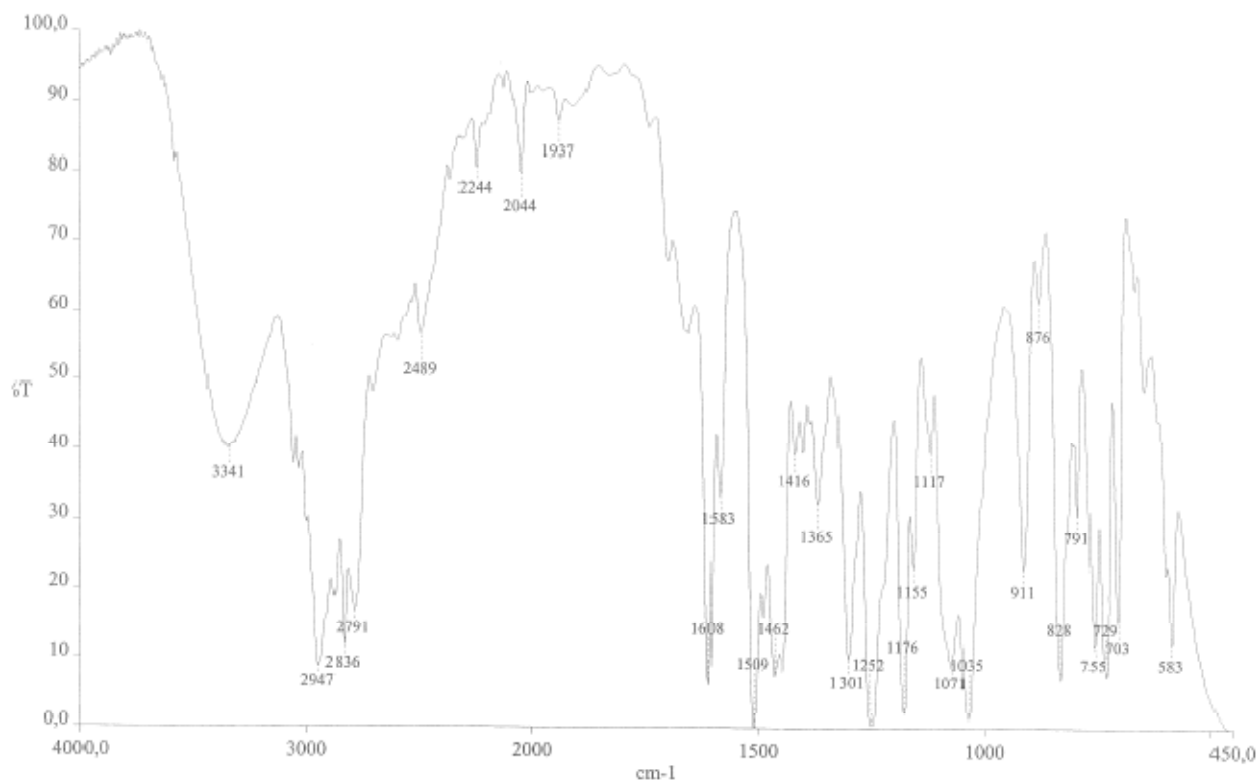

*Compound 3*

---

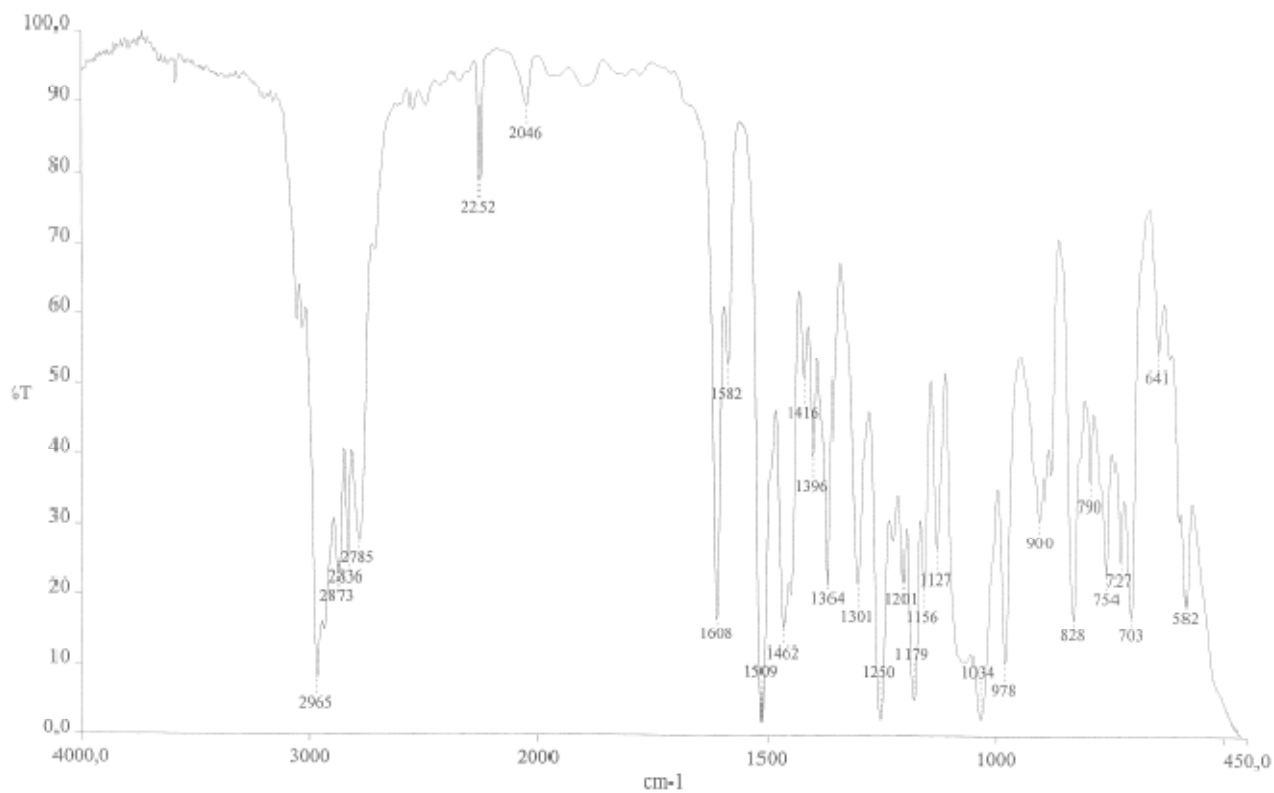

*Compound 4*

---

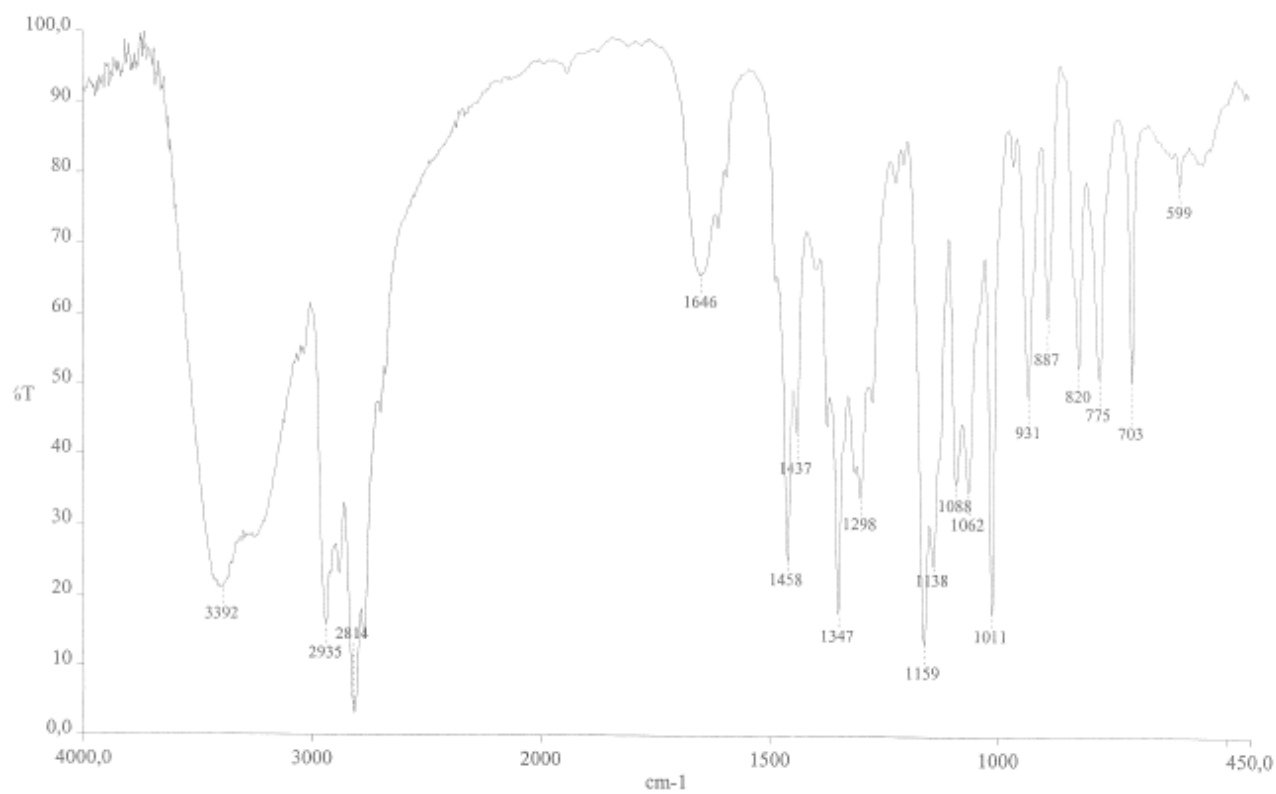



*Compound 5*

---

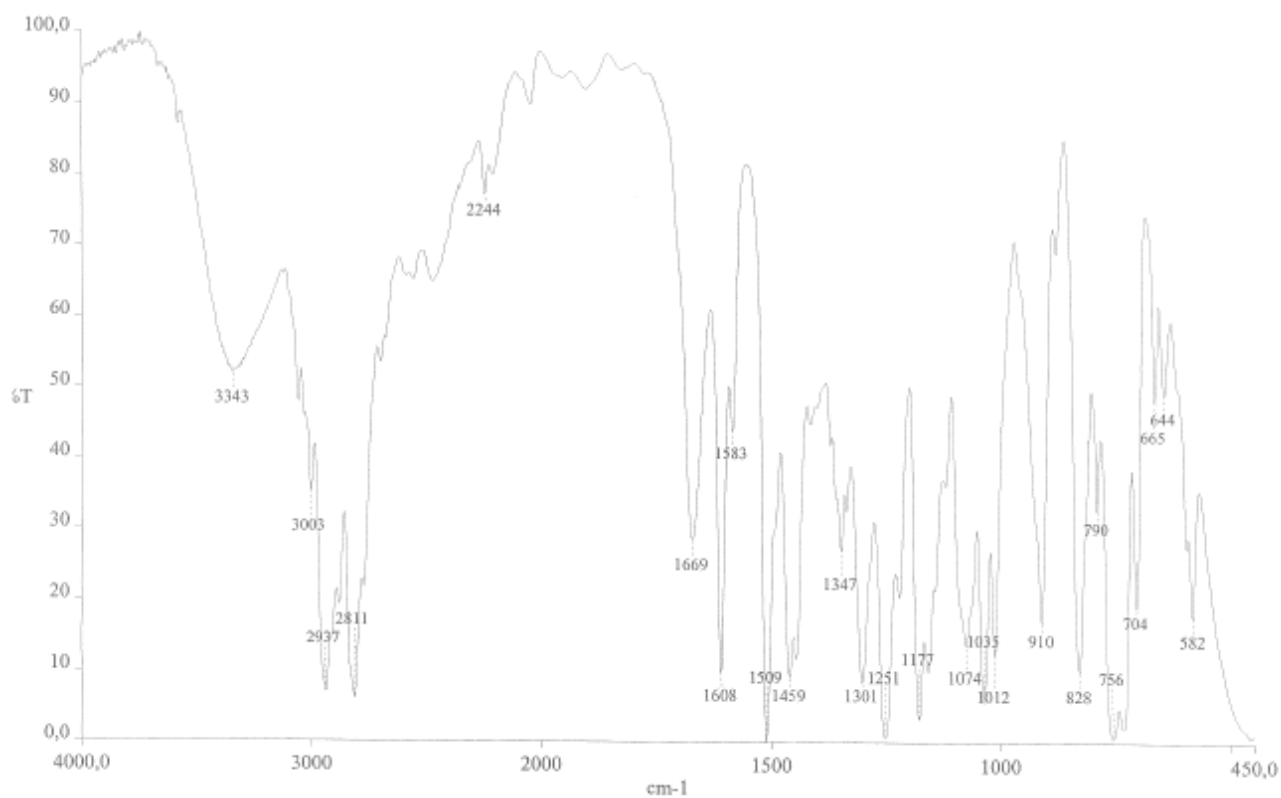

*Compound 6*

---

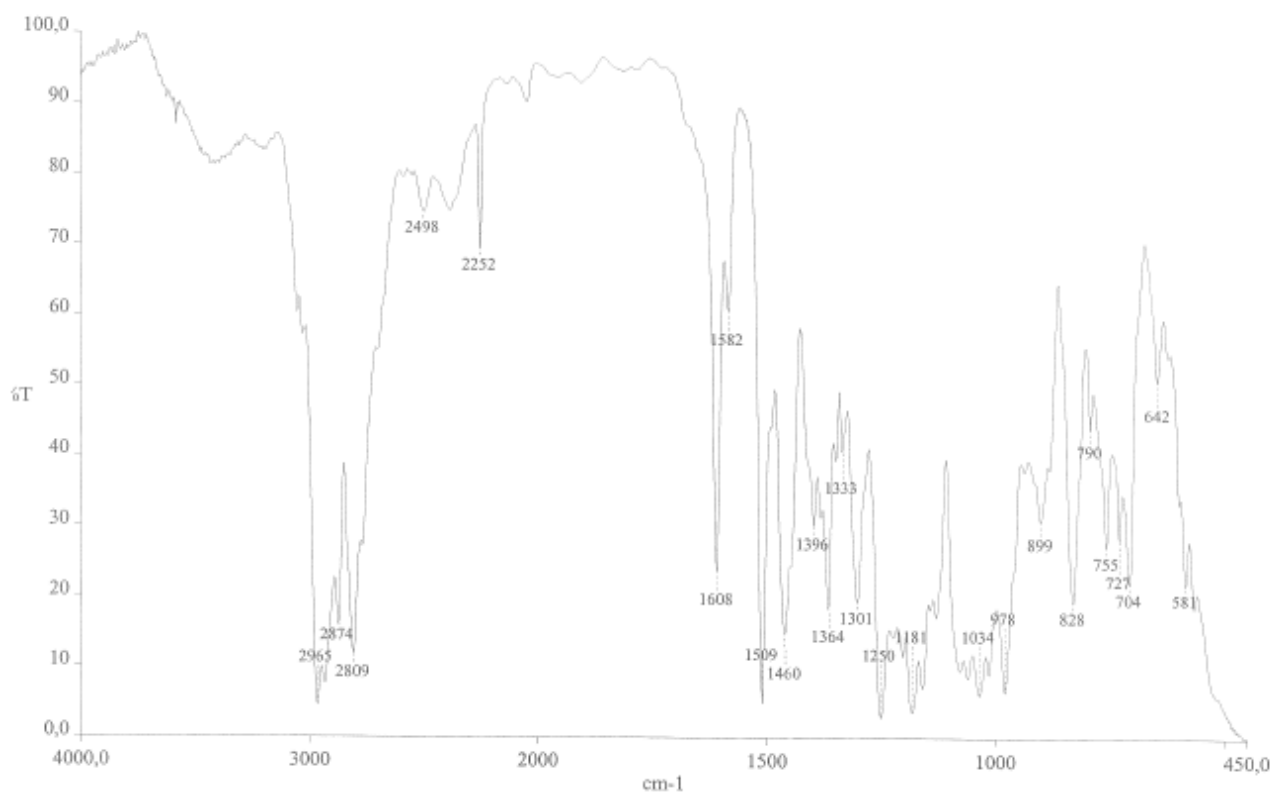

Supplement: c1ob05085k.pdf [file c1ob05085k.pdf]
